# Supplementary material for: Constraining N 2 O emissions since 1940 using firn air isotope measurements in both hemispheres
Source: Copernicus journal article supplement (doi:10.5194/acp-17-4539-2017), 2017-04-05
Supplement: Supplementary file 1 [file Supplementary material_acp.xlsx]

## Sheet: NEEM
Nitrous oxide atmospheric reconstruction data
Reference: Prokopiou, M., Martinerie, P., Sapart, C. J., Witrant, E., Monteil, G., Ishijima, K., Bernard, S., Kaiser, J., Levin, I., Blunier, T., Etheridge, D., Dlugokencky, E., van de Wal, R. S. W., and Röckmann, T.: Constraining N2O emissions since 1940 using firn air isotope measurements in both hemispheres, Atmos. Chem. Phys., 17, 1-25, doi:10.5194/acp-17-1-2017, 2017.
Creation date: 24March2017
Contact: M.Prokopiou, m.prokopiou@uu.nl, Institute for Marine and Atmospheric Research Utrecht, Utrecht, The Netherlands
Data sources: Röckmann et al., 2003; Bernard et al., 2006; Ishijima et al., 2007; Sowers et al., 2003 (reference list)
NEEM-EU-08
depth	δ15N	frac_cor_δ15Ν	uncertainty		depth	N2O	frac_cor_N2O	uncertainty		depth	uncorrected d18n2o	frac_cor_d18n2o	uncertainty		depth	uncorrected 1d15n2o	frac_cor_1d15n2o	uncertainty		depth	uncorrected_2d15n2o	frac_cor_2d15n2o	uncertainty
0	6.14	6.14	0.07		0	316.89	316.89	0.5		0	44.59	44.59	0.15		0	-2.17	-2.17	0.35		0	14.85	14.85	0.36
4.9	6.21	6.205	0.12							4.9	44.6	44.59	0.1
10.1	6.25	6.222	0.01		10.1	317.75	317.602	0.5		10.1	44.54	44.481	0.11		10.1	-2.6	-2.628	0.4		10.1	15.48	15.451	0.4
19.75	6.3	6.233	0.19		19.75	313.37	312.999	0.5		19.75	44.55	44.41	0.01		19.75	-2.45	-2.516	0.71		19.75	15.44	15.372	0.74
34.72	6.47	6.348	0.12							34.72	44.6	44.344	0.05
50	6.48	6.302	0.17		50	313.88	312.809	0.5		50	44.93	44.557	0.07		50	-2.39	-2.566	0.59		50	15.74	15.56	0.61
57.4	6.73	6.528	0.03		57.4	315.3	314.06	0.5		57.4	44.99	44.565	0.21		57.4	-2.28	-2.48	0.95		57.4	16.13	15.926	0.95
61.95	6.8	6.589	0.14							61.95	45.15	44.707	0.05
65.75	7.01	6.815	0.14		65.75	302.93	301.542	0.5		65.75	45.17	44.757	0.13		65.75	-1.37	-1.564	0.9		65.75	15.78	15.582	0.91
68.05	7.51	7.308	0.09		68.05	292.99	291.599	0.5		68.05	45.6	45.174	0.16		68.05	-1.15	-1.35	0.35		68.05	16.57	16.366	0.36
70.05	7.9	7.696	0.03		70.05	293.27	291.874	0.5		70.05	45.46	45.029	0.02		70.05	-1.03	-1.233	1.77		70.05	17.22	17.014	1.77
72	8.14	7.927	0.01		72	287.07	285.672	0.5		72	45.84	45.391	0.08		72	-0.33	-0.541	0.6		72	16.99	16.775	0.6
74.08	8.31	8.082	0		74.08	288.72	287.32	0.5		74.08	45.71	45.231	0.17		74.08	1.33	1.104	0.35		74.08	15.67	15.44	0.35
75.9	8.39	8.149	0.06		75.9	288.94	287.538	0.5		75.9	45.51	45.005	0.05		75.9	0.8	0.561	0.52		75.9	16.36	16.117	0.53
NEEM-09
depth	δ15Ν	frac_cor_δ15Ν	uncertainty		depth	N2O	frac_cor_N2O	uncertainty		depth	uncorrected d18n2o	frac_cor_d18n2o	uncertainty		depth	uncorrected 1d15n2o	frac_cor_1d15n2o	uncertainty		depth	uncorrected_2d15n2o	frac_cor_2d15n2o	uncertainty
0	6.43	6.43	0.05		0	320.99	320.99	0.5		0	44.94	44.94	0.18		0	-2.5	-2.5	0.2		0	15.32	15.32	0.21
20.4	6.47	6.399	0.13		20.4	324.23	323.845	0.5		20.4	45.12	44.971	0.24		20.4	-2.36	-2.43	0.32		20.4	15.31	15.239	0.11
30.2	6.59	6.481	0.1		30.2	320.68	320.067	0.5		30.2	45.18	44.951	0.2		30.2	-1.88	-1.988	0.35		30.2	15.07	14.96	0.23
39.23	6.69	6.547	0.11		39.23	318.81	317.988	0.5		39.23	45.33	45.031	0.15		39.23	-1.72	-1.861	0.36		39.23	15.1	14.956	0.22
50.7	6.74	6.553	0.08		50.7	319.33	318.239	0.5		50.7	45.48	45.088	0.21		50.7	-1.86	-2.045	0.17		50.7	15.35	15.162	0.15
60.3	6.9	6.681	0.05		60.3	319.05	317.745	0.5		60.3	45.56	45.102	0.23		60.3	-1.17	-1.386	0.17		60.3	14.99	14.77	0.22
62.02	6.87	6.648	0.03		62.02	317.36	316.017	0.5		62.02	45.51	45.045	0.11		62.02	-1.58	-1.799	0.24		62.02	15.34	15.117	0.16
63.8	6.92	6.71	0.13		63.8	313.18	311.817	0.5		63.8	45.48	45.039	0.21		63.8	-1.55	-1.757	0.27		63.8	15.39	15.179	0.25
66.8	7.18	6.977	0.11		66.8	304	302.622	0.5		66.8	45.52	45.094	0.26		66.8	-0.59	-0.79	0.34		66.8	14.96	14.756	0.15
69.4	7.57	7.374	0.05
73.6	8.46	8.236	0.08		73.6	293.09	291.695	0.5		73.6	46.24	45.769	0.22

## Sheet: N2O history
Year	δ15N	uncertainty		Year	δ18O	uncertainty		Year	δ15Nα	uncertainty		Year	δ15Nβ	uncertainty		Year	mole fraction [nmol/mol]	uncertainty
1939	8.63592	0.195643		1939	45.4492	0.295504		1939	16.9419	0.736503		1939	0.117187	0.718931		1939	289.945	0.801872
1940	8.62982	0.196278		1940	45.4363	0.294436		1940	16.9472	0.735199		1940	0.0774423	0.714947		1940	289.958	0.788408
1941	8.62259	0.197543		1941	45.4234	0.293394		1941	16.9524	0.734553		1941	0.0376803	0.711027		1941	289.974	0.777157
1942	8.61419	0.199354		1942	45.4104	0.292379		1942	16.9573	0.734445		1942	-0.00209949	0.707171		1942	289.995	0.768099
1943	8.6046	0.201627		1943	45.3974	0.29139		1943	16.9621	0.734757		1943	-0.0418969	0.70338		1943	290.022	0.761186
1944	8.59378	0.204279		1944	45.3844	0.290428		1944	16.9666	0.735375		1944	-0.0817121	0.699656		1944	290.053	0.756359
1945	8.58171	0.207233		1945	45.3714	0.289492		1945	16.9708	0.736189		1945	-0.121545	0.696001		1945	290.091	0.753533
1946	8.56834	0.210416		1946	45.3584	0.288583		1946	16.9746	0.737094		1946	-0.161395	0.692414		1946	290.135	0.752607
1947	8.55365	0.21376		1947	45.3453	0.287701		1947	16.9781	0.737996		1947	-0.201262	0.688897		1947	290.186	0.753462
1948	8.53761	0.217202		1948	45.3322	0.286846		1948	16.9811	0.738805		1948	-0.241147	0.685451		1948	290.244	0.755973
1949	8.52018	0.220685		1949	45.3191	0.286017		1949	16.9836	0.73944		1949	-0.281049	0.682077		1949	290.311	0.759998
1950	8.50134	0.224157		1950	45.3059	0.285215		1950	16.9855	0.73983		1950	-0.320967	0.678777		1950	290.387	0.765385
1951	8.48106	0.227569		1951	45.2927	0.284439		1951	16.9869	0.739911		1951	-0.360902	0.675551		1951	290.473	0.771969
1952	8.45932	0.230878		1952	45.2795	0.28369		1952	16.9875	0.73963		1952	-0.400853	0.672401		1952	290.57	0.779589
1953	8.4361	0.234045		1953	45.2663	0.282967		1953	16.9874	0.738942		1953	-0.440819	0.669328		1953	290.678	0.788068
1954	8.41138	0.237033		1954	45.253	0.28227		1954	16.9864	0.737812		1954	-0.480801	0.666332		1954	290.798	0.797228
1955	8.38516	0.23981		1955	45.2397	0.281599		1955	16.9846	0.736215		1955	-0.520797	0.663414		1955	290.932	0.80689
1956	8.35742	0.242347		1956	45.2264	0.280953		1956	16.9818	0.734133		1956	-0.560808	0.660576		1956	291.079	0.816863
1957	8.32819	0.244615		1957	45.2131	0.280332		1957	16.978	0.73156		1957	-0.600832	0.657818		1957	291.242	0.826952
1958	8.29746	0.246592		1958	45.1997	0.279735		1958	16.973	0.728496		1958	-0.640869	0.655141		1958	291.422	0.836972
1959	8.26526	0.248255		1959	45.1863	0.279163		1959	16.9668	0.724953		1959	-0.680918	0.652546		1959	291.618	0.846714
1960	8.23162	0.249587		1960	45.1728	0.278614		1960	16.9593	0.720946		1960	-0.720978	0.650034		1960	291.833	0.855988
1961	8.19658	0.25057		1961	45.1593	0.278089		1961	16.9505	0.716502		1961	-0.76105	0.647606		1961	292.067	0.864598
1962	8.1602	0.251193		1962	45.1458	0.277586		1962	16.9402	0.711651		1962	-0.801131	0.645261		1962	292.322	0.872348
1963	8.12253	0.251443		1963	45.1322	0.277105		1963	16.9284	0.70643		1963	-0.841222	0.643		1963	292.598	0.879062
1964	8.08366	0.251313		1964	45.1186	0.276645		1964	16.915	0.700883		1964	-0.88132	0.640825		1964	292.897	0.884572
1965	8.04366	0.250799		1965	45.105	0.276206		1965	16.8999	0.695054		1965	-0.921427	0.638734		1965	293.22	0.888732
1966	8.00263	0.249901		1966	45.0913	0.275787		1966	16.8832	0.688994		1966	-0.96154	0.63673		1966	293.567	0.891418
1967	7.96069	0.24862		1967	45.0776	0.275388		1967	16.8647	0.682754		1967	-1.00166	0.63481		1967	293.939	0.892546
1968	7.91795	0.246965		1968	45.0639	0.275007		1968	16.8444	0.676387		1968	-1.04179	0.632977		1968	294.337	0.892066
1969	7.87455	0.244947		1969	45.0501	0.274644		1969	16.8223	0.669945		1969	-1.08192	0.631229		1969	294.763	0.889969
1970	7.83062	0.242585		1970	45.0363	0.274299		1970	16.7984	0.663483		1970	-1.12205	0.629566		1970	295.215	0.886321
1971	7.78633	0.239901		1971	45.0224	0.27397		1971	16.7727	0.657051		1971	-1.16219	0.627989		1971	295.696	0.881212
1972	7.74182	0.236928		1972	45.0085	0.273658		1972	16.7451	0.6507		1972	-1.20233	0.626496		1972	296.205	0.874807
1973	7.69727	0.233702		1973	44.9946	0.273361		1973	16.7158	0.644477		1973	-1.24248	0.625088		1973	296.741	0.867336
1974	7.65286	0.230269		1974	44.9806	0.273078		1974	16.6848	0.638427		1974	-1.28263	0.623763		1974	297.306	0.859057
1975	7.60874	0.226682		1975	44.9666	0.27281		1975	16.6521	0.63259		1975	-1.32279	0.622522		1975	297.898	0.850283
1976	7.56511	0.223002		1976	44.9526	0.272556		1976	16.6179	0.627006		1976	-1.36295	0.621362		1976	298.518	0.841338
1977	7.52214	0.219294		1977	44.9385	0.272314		1977	16.5823	0.621708		1977	-1.40311	0.620284		1977	299.163	0.832558
1978	7.47998	0.215627		1978	44.9244	0.272086		1978	16.5454	0.616724		1978	-1.44328	0.619286		1978	299.834	0.824248
1979	7.43881	0.212071		1979	44.9103	0.271869		1979	16.5073	0.61208		1979	-1.48345	0.618367		1979	300.528	0.81666
1980	7.39877	0.208692		1980	44.8961	0.271664		1980	16.4682	0.607794		1980	-1.52364	0.617526		1980	301.244	0.809963
1981	7.35998	0.205549		1981	44.882	0.271471		1981	16.4283	0.60388		1981	-1.56383	0.616762		1981	301.98	0.804238
1982	7.32255	0.20269		1982	44.8678	0.271289		1982	16.3878	0.600343		1982	-1.60402	0.616073		1982	302.734	0.799447
1983	7.28656	0.200145		1983	44.8535	0.271118		1983	16.3469	0.597187		1983	-1.64423	0.615459		1983	303.504	0.795453
1984	7.25205	0.197929		1984	44.8393	0.270958		1984	16.3059	0.594405		1984	-1.68446	0.614917		1984	304.287	0.792025
1985	7.21903	0.196036		1985	44.825	0.270808		1985	16.2649	0.591985		1985	-1.72469	0.614447		1985	305.081	0.78887
1986	7.18744	0.194442		1986	44.8107	0.270669		1986	16.2242	0.58991		1986	-1.76495	0.614047		1986	305.883	0.785693
1987	7.15721	0.193112		1987	44.7964	0.270541		1987	16.1841	0.588157		1987	-1.80522	0.613716		1987	306.69	0.782207
1988	7.12817	0.192003		1988	44.7821	0.270423		1988	16.1447	0.586701		1988	-1.84551	0.613452		1988	307.499	0.778199
1989	7.10012	0.191073		1989	44.7678	0.270316		1989	16.1063	0.585511		1989	-1.88583	0.613255		1989	308.307	0.773568
1990	7.07277	0.190287		1990	44.7534	0.27022		1990	16.0691	0.584557		1990	-1.92617	0.613123		1990	309.113	0.768328
1991	7.04576	0.18962		1991	44.7391	0.270136		1991	16.0333	0.583808		1991	-1.96655	0.613055		1991	309.913	0.762617
1992	7.01867	0.189061		1992	44.7248	0.270063		1992	15.999	0.583237		1992	-2.00695	0.613051		1992	310.706	0.756686
1993	6.99101	0.188608		1993	44.7104	0.270001		1993	15.9664	0.582817		1993	-2.0474	0.613108		1993	311.49	0.750848
1994	6.96225	0.188262		1994	44.696	0.269952		1994	15.9357	0.582531		1994	-2.08789	0.613227		1994	312.262	0.745406
1995	6.93187	0.188017		1995	44.6817	0.269916		1995	15.9067	0.582367		1995	-2.12842	0.613407		1995	313.023	0.740596
1996	6.89941	0.187851		1996	44.6673	0.269892		1996	15.8797	0.582321		1996	-2.16899	0.613646		1996	313.772	0.736514
1997	6.86462	0.187724		1997	44.6529	0.269882		1997	15.8544	0.582401		1997	-2.20962	0.613946		1997	314.507	0.733074
1998	6.82765	0.187583		1998	44.6385	0.269886		1998	15.8309	0.582624		1998	-2.25029	0.614305		1998	315.231	0.730008
1999	6.78889	0.187421		1999	44.6241	0.269904		1999	15.8088	0.583011		1999	-2.291	0.614722		1999	315.943	0.726917
2000	6.74873	0.187268		2000	44.6096	0.269936		2000	15.7881	0.583595		2000	-2.33175	0.615199		2000	316.644	0.723365
2001	6.70762	0.187144		2001	44.5952	0.269983		2001	15.7686	0.584414		2001	-2.37254	0.615734		2001	317.337	0.719063
2002	6.66599	0.187049		2002	44.5808	0.270046		2002	15.7503	0.585513		2002	-2.41336	0.616328		2002	318.023	0.714034
2003	6.62415	0.186976		2003	44.5663	0.270125		2003	15.7329	0.586934		2003	-2.45421	0.61698		2003	318.705	0.708866
2004	6.58228	0.186927		2004	44.5519	0.270219		2004	15.7163	0.58871		2004	-2.49507	0.61769		2004	319.386	0.704902
2005	6.54048	0.186928		2005	44.5374	0.270329		2005	15.7002	0.590872		2005	-2.53595	0.618458		2005	320.069	0.704355
2006	6.49881	0.187024		2006	44.523	0.270454		2006	15.6846	0.593446		2006	-2.57684	0.619284		2006	320.757	0.710202
2007	6.45727	0.187269		2007	44.5085	0.270596		2007	15.6692	0.596446		2007	-2.61774	0.620168		2007	321.452	0.725562
2008	6.42447	0.187586		2008	44.497	0.270719		2008	15.6572	0.599111		2008	-2.65012	0.620906		2008	322.005	0.745511
