# Supplementary material for: Constraining N 2 O emissions since 1940 using firn air isotope measurements in both hemispheres
Source: Copernicus journal article supplement (doi:10.5194/acp-17-4539-2017), 2017-04-05
Supplement: Supplementary file [file acp-17-4539-2017-supplement-title-page.pdf › acp-17-4539-2017-supplement-title-page.pdf]

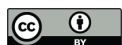

*Supplement of*

## **Constraining N<sub>2</sub>O emissions since 1940 using firn air isotope measurements in both hemispheres**

**Markella Prokopiou et al.**

*Correspondence to:* Markella Prokopiou (m.prokopiou@uu.nl)

- [acp-17-4539-2017-supplement-title-page.pdf](#)
- [Supplementary material\\_acp.xlsx](#)

The copyright of individual parts of the supplement might differ from the article licence.
